# Supplementary material for: Association between diabetes mellitus and osteoarthritis: systematic literature review and meta-analysis
Source: PubMed Central journal article supplement — RMD Open. 2015 Jun 2;1(1):e000077. doi: 10.1136/rmdopen-2015-000077 (PMC4613158; doi:10.1136/rmdopen-2015-000077), 2015-06-02
Supplement: supp_rmdopen-2015-000077_rmdopen-2015-000077supp.pdf [file supp_rmdopen-2015-000077_rmdopen-2015-000077supp.pdf]

**Supplementary Table 1: Description of localisations of OA in selected studies**

| <b>Studies<br/>(1<sup>st</sup> author)</b> | <b>Knee</b> | <b>Hip</b> | <b>Hand</b> | <b>Spine</b> | <b>Generalized</b> |
|--------------------------------------------|-------------|------------|-------------|--------------|--------------------|
| Davies-Tuck[1]                             | X           |            |             |              |                    |
| Ray[2]                                     | X           |            | X           | X            |                    |
| Stürmer[3]                                 | X           | X          |             |              | X                  |
| Inoue[4]                                   | X           |            |             |              |                    |
| Yoshimura[5]                               | X           |            |             |              |                    |
| Lanas[6]                                   | X           | X          | X           | X            |                    |
| Reeuwijk[7]                                | X           | X          |             |              |                    |
| Siviero[8]                                 | X           | X          | X           |              |                    |
| Engstrom[9]                                | X           | X          |             |              |                    |
| Dahaghin[10]                               |             |            | X           |              |                    |
| Philbin[11]                                | X           | X          |             |              |                    |
| Hart[12]                                   | X           |            |             |              |                    |
| Denko[13]                                  |             |            |             | X            | X                  |
| Horn[14]                                   | X           |            |             |              |                    |
| Bagge[15]                                  | X           |            | X           |              |                    |
| Cimmino (1990)[16]                         | X           | X          | X           | X            |                    |
| Ladjimi[17]                                |             |            |             | X            | X                  |
| Lindberg[18]                               |             | X          |             |              |                    |
| Typpo[19]                                  |             | X          |             |              |                    |
| Dequeker[20]                               |             | X          |             |              |                    |
| Schett [21]                                | X           | X          |             |              |                    |
| Navarro[22]                                | X           |            |             |              |                    |
| Orellana[23]                               |             |            | X           |              |                    |
| Anderson[24]                               | X           |            |             |              |                    |
| Sowers[25]                                 | X           |            |             |              |                    |
| Silveri[26]                                | X           |            |             |              | X                  |
| Jamsen[27]                                 | X           | X          |             |              |                    |
| Adams[28]                                  | X           |            |             |              |                    |
| Nieves-Plaza[29]                           | X           |            | X           |              |                    |
| Haugen[30]                                 |             |            | X           |              |                    |
| Perruccio[31]                              | X           | X          |             |              |                    |
| Baker[32]                                  | X           |            |             |              |                    |
| Peniston[33]                               | X           |            |             |              |                    |
| Wang Y. [34]                               | X           |            | X           | X            |                    |
| Shin[35]                                   | X           |            |             |              |                    |

|                    |   |   |   |  |   |
|--------------------|---|---|---|--|---|
| Cimmino (2005)[36] | X | X | X |  | X |
| Magnusson[37]      |   |   | X |  |   |
| Conaghan[38]       | X |   |   |  |   |
| Zulling[39]        | X | X |   |  |   |
| Bija[40]           | X |   |   |  |   |
| Wang S. [41]       | X | X | X |  |   |

For other studies, localisation was not detailed

Supplementary table 2 : Description of studies for OA prevalence in DM population (2A) and for DM prevalence in OA population (2B)

**A/ Frequency of OA in DM patients**

| Authors                    | Year of publication | Nb OA pts | Total nb of DM pts |
|----------------------------|---------------------|-----------|--------------------|
| Ray (knee)                 | 2011                | 27        | 100                |
| Sarkar                     | 2008                | 19        | 80                 |
| Miksch                     | 2009                | 797       | 1399               |
| Schett (transversal study) | 2012                | 11        | 65                 |
| Inoue                      | 2011                | 13        | 35                 |
| Puenpatom                  | 2009                | 299       | 1054               |
| Dahaghin                   | 2007                | 86        | 265                |
| Typpo                      | 1985                | 25        | 55                 |
| Navarro                    | 2012                | 35        | 81                 |
| Orellana                   | 2012                | 13        | 59                 |
| Siviero                    | 2009                | 32        | 224                |
| Engstrom (Knee)            | 2009                | 26        | 834                |
| Engstrom (Hip)             | 2009                | 16        | 833                |
| Frey (Men)                 | 1996                | 10        | 69                 |
| Frey (Women)               | 1996                | 32        | 73                 |
| Haugen (Rx OA)             | 2013                | 49        | 87                 |
| Haugen (Stp OA)            | 2013                | 14        | 52                 |
| Ladjimi                    | 1985                | 20        | 34                 |
| Nieves-Plaza               | 2013                | 49        | 100                |
| Shin                       | 2014                | 134       | 299                |

| Total Nb OA pts | Total nb of DM pts | Prevalence (%) | 95%IC |
|-----------------|--------------------|----------------|-------|
| 1707            | 5788               | 29.5           | 1.2   |

**B/ Frequency of DM in OA patients**

| Authors                    | Year of publication | Nb DM pts | Total nb of OA pts |
|----------------------------|---------------------|-----------|--------------------|
| Stürmer                    | 2001                | 74        | 809                |
| Lanas                      | 2010                | 550       | 3293               |
| Reeuwijk                   | 2010                | 28        | 288                |
| Adams                      | 2013                | 7368      | 39031              |
| Shirinsky                  | 2013                | 151       | 1390               |
| Perruccio (Knee)           | 2013                | 76        | 540                |
| Perruccio (Hip)            | 2013                | 190       | 443                |
| Schett (transversal study) | 2012                | 11        | 60                 |
| Inoue                      | 2011                | 13        | 251                |
| Puenpatom                  | 2009                | 299       | 975                |
| Dahaghin                   | 2007                | 86        | 986                |
| Typpo                      | 1985                | 25        | 254                |
| Navarro                    | 2012                | 35        | 184                |
| Orellana                   | 2012                | 13        | 70                 |
| Jamsen                     | 2012                | 6365      | 96754              |
| Backer                     | 2013                | 9         | 62                 |
| Peniston                   | 2012                | 100       | 947                |
| Siviero                    | 2009                | 32        | 177                |
| Engstrom (Knee)            | 2009                | 26        | 89                 |
| Engstrom (Hip)             | 2009                | 16        | 120                |
| Frey (Men)                 | 1996                | 10        | 123                |
| Frey (Women)               | 1996                | 32        | 242                |
| Haugen (Rx OA)             | 2013                | 49        | 540                |
| Haugen (Stp OA)            | 2013                | 14        | 186                |
| Philbin                    | 1996                | 13        | 46                 |
| Cimmino                    | 1990                | 56        | 1026               |
| Lindberg                   | 1985                | 0         | 279                |
| Rahman                     | 2013                | 4694      | 40817              |
| Wang                       | 2013                | 68493     | 428084             |
| Cimmino                    | 2005                | 3591      | 23939              |
| Magnusson                  | 2014                | 46        | 530                |
| Conaghan                   | 2014                | 213       | 1187               |
| Zullig                     | 2014                | 114       | 300                |
| Bija                       | 2014                | 13        | 148                |
| Shin                       | 2014                | 134       | 919                |

| Total Nb DM pts | Total nb of OA pts | Prevalence (%) | 95%IC |
|-----------------|--------------------|----------------|-------|
| 92939           | 645089             | 14,4           | 0,1   |

Nb: Number  
 DM: diabetes mellitus  
 OA: Osteoarthritis  
 pt: patients

Supplementary Figure 1: Funnel Plot showing potential for publication bias.

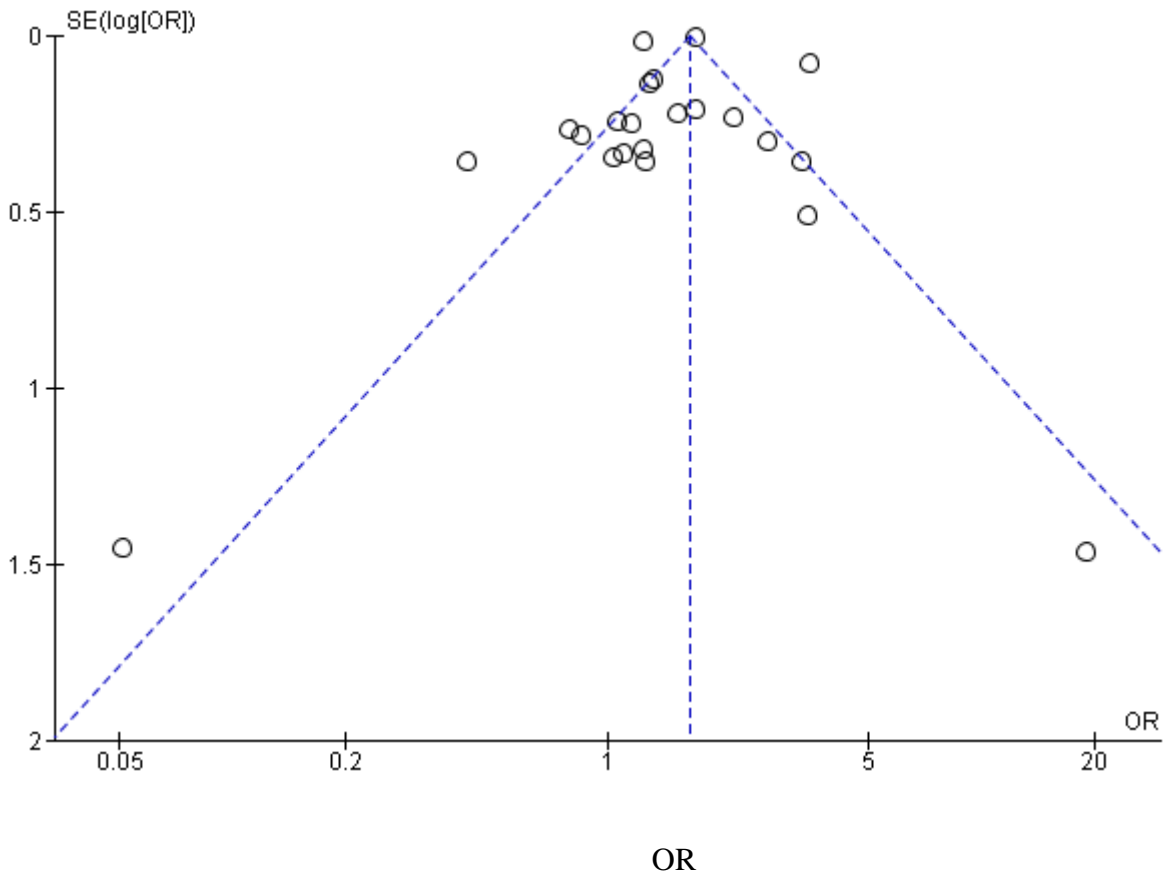

Funnel plot shows the relation between association size and sample size. Study size is plotted on the vertical axis and OR is plotted on the horizontal axis.

OR: odds ratio

## References

1. Davies-Tuck ML, Wang Y, Wluka AE, Berry PA, Giles GG, English DR, et al. Increased fasting serum glucose concentration is associated with adverse knee structural changes in adults with no knee symptoms and diabetes. *Maturitas* 2012;72:373-8.
2. Ray S, Datta AK, Sinhamahapatra P, Ray I, Mukhopadhyay P, Dasgupta S. Prevalence of rheumatic conditions in patients with diabetes mellitus in a tertiary care hospital. *J Indian Med Assoc* 2011;109:74-8.
3. Sturmer T, Brenner H, Brenner RE, Gunther KP. Non-insulin dependent diabetes mellitus (NIDDM) and patterns of osteoarthritis. The Ulm osteoarthritis study. *Scand J Rheumatol* 2001;30:169-71.
4. Inoue R, Ishibashi Y, Tsuda E, Yamamoto Y, Matsuzaka M, Takahashi I, et al. Medical problems and risk factors of metabolic syndrome among radiographic knee osteoarthritis patients in the Japanese general population. *J Orthop Sci* 2011;16:704-9.
5. Yoshimura N, Muraki S, Oka H, Kawaguchi H, Nakamura K, Akune T. Association of knee osteoarthritis with the accumulation of metabolic risk factors such as overweight, hypertension, dyslipidemia, and impaired glucose tolerance in Japanese men and women: the ROAD study. *J Rheumatol* 2011;38:921-30.
6. Lanus A, Tornero J, Zamorano JL. Assessment of gastrointestinal and cardiovascular risk in patients with osteoarthritis who require NSAIDs: the LOGICA study. *Ann Rheum Dis* 2010;69:1453-8.
7. Reeuwijk KG, de Rooij M, van Dijk GM, Veenhof C, Steultjens MP, Dekker J. Osteoarthritis of the hip or knee: which coexisting disorders are disabling? *Clin Rheumatol* 2010;29:739-47.
8. Siviero P, Tonin P, Maggi S. Functional limitations of upper limbs in older diabetic individuals. The Italian Longitudinal Study on Aging. *Aging Clin Exp Res* 2009;21:458-62.
9. Engstrom G, Gerhardsson de Verdier M, Roloff J, Nilsson PM, Lohmander LS. C-reactive protein, metabolic syndrome and incidence of severe hip and knee osteoarthritis. A population-based cohort study. *Osteoarthritis Cartilage* 2009;17:168-73.
10. Dahaghin S, Bierma-Zeinstra SM, Koes BW, Hazes JM, Pols HA. Do metabolic factors add to the effect of overweight on hand osteoarthritis? The Rotterdam Study. *Ann Rheum Dis* 2007;66:916-20.
11. Philbin EF, Ries MD, Groff GD, Sheesley KA, French TS, Pearson TA. Osteoarthritis as a determinant of an adverse coronary heart disease risk profile. *J Cardiovasc Risk* 1996;3:529-33.
12. Hart DJ, Doyle DV, Spector TD. Association between metabolic factors and knee osteoarthritis in women: the Chingford Study. *J Rheumatol* 1995;22:1118-23.
13. Denko CW, Boja B, Moskowitz RW. Growth promoting peptides in osteoarthritis and diffuse idiopathic skeletal hyperostosis--insulin, insulin-like growth factor-I, growth hormone. *J Rheumatol* 1994;21:1725-30.
14. Horn CA, Bradley JD, Brandt KD, Kreipke DL, Slowman SD, Kalasinski LA. Impairment of osteophyte formation in hyperglycemic patients with type II diabetes mellitus and knee osteoarthritis. *Arthritis Rheum* 1992;35:336-42.
15. Bagge E, Bjelle A, Eden S, Svanborg A. Factors associated with radiographic osteoarthritis: results from the population study 70-year-old people in Goteborg. *J Rheumatol* 1991;18:1218-22.

16. Cimmino MA, Cutolo M. Plasma glucose concentration in symptomatic osteoarthritis: a clinical and epidemiological survey. *Clin Exp Rheumatol* 1990;8:251-7.
17. Ladjimi A, Youssef S, Chamakhi S, Slim R, Hamza M, Ben Jaafar M, et al. [Rheumatologic manifestations in diabetes]. *Tunis Med* 1985;63:213-9.
18. Lindberg H, Nilsson BE. Coinciding morbidity in patients with coxarthrosis. An epidemiological study of roentgen examinations. *Arch Orthop Trauma Surg* 1985;104:82-4.
19. Typpo T. Osteoarthritis of the hip. Radiologic findings and etiology. *Ann Chir Gynaecol Suppl* 1985;201:1-38.
20. Dequeker J, Burssens A, Bouillon R. Dynamics of growth hormone secretion in patients with osteoporosis and in patients with osteoarthritis. *Horm Res* 1982;16:353-6.
21. Schett G, Kiechl S, Bonora E, Zwerina J, Mayr A, Axmann R, et al. Vascular cell adhesion molecule 1 as a predictor of severe osteoarthritis of the hip and knee joints. *Arthritis Rheum* 2009;60:2381-9.
22. Navarro N, Orellana C, Vasquez I, Casado E, Gratacos J, Larrosa M. High frequency of cardiovascular disease in patients with knee osteoarthritis in a primary care setting. *EULAR Congres 2012;Abstract SAT0320*.
23. Orellana C, Navarro N, Calvet J, Garcia Manrique M, Gratacos J, Larrosa M. Higher frequency of metabolic syndrome in patients with hand osteoarthritis is more pronounced in obese patients. *EULAR Congres 2012;Abstract FRI0305*.
24. Anderson JJ, Felson DT. Factors associated with osteoarthritis of the knee in the first national Health and Nutrition Examination Survey (HANES I). Evidence for an association with overweight, race, and physical demands of work. *Am J Epidemiol* 1988;128:179-89.
25. Sowers M, Karvonen-Gutierrez CA, Palmieri-Smith R, Jacobson JA, Jiang Y, Ashton-Miller JA. Knee osteoarthritis in obese women with cardiometabolic clustering. *Arthritis Rheum* 2009;61:1328-36.
26. Silveri F, Brecciaroli D, Argentati F, Cervini C. Serum levels of insulin in overweight patients with osteoarthritis of the knee. *J Rheumatol* 1994;21:1899-902.
27. Jansen E, Peltola M, Eskelinen A, Lehto MU. Comorbid diseases as predictors of survival of primary total hip and knee replacements: a nationwide register-based study of 96 754 operations on patients with primary osteoarthritis. *Ann Rheum Dis* 2012;72:1975-82.
28. Adams AL, Paxton EW, Wang JQ, Johnson ES, Bayliss EA, Ferrara A, et al. Surgical outcomes of total knee replacement according to diabetes status and glycemic control, 2001 to 2009. *J Bone Joint Surg Am* 2013;95:481-7.
29. Nieves-Plaza M, Castro-Santana LE, Font YM, Mayor AM, Vila LM. Association of hand or knee osteoarthritis with diabetes mellitus in a population of Hispanics from Puerto Rico. *J Clin Rheumatol* 2013;19:1-6.
30. Haugen IK, Ramachandran VS, Misra D, Neogi T, Niu J, Yang T, et al. Hand osteoarthritis in relation to mortality and incidence of cardiovascular disease: data from the Framingham Heart Study. *Ann Rheum Dis* 2013.
31. Perruccio AV, Kandel RA, Davis AM. Cardiovascular disease in osteoarthritis: hip versus knee and the influence of multiple symptomatic joint involvement. *ACR congres 2013;Abstract 266*.
32. Baker C, A. L, Lavalley MP, Keysor JJ, Felson DT. Automated telephone-linked communication: a novel approach to enhance long-term adherence to resistance training exercise among people with knee osteoarthritis. *ACR congres 2013;Abstract 1818*.

33. Peniston JH, Gold MS, Wieman MS, Alwine LK. Long-term tolerability of topical diclofenac sodium 1% gel for osteoarthritis in seniors and patients with comorbidities. *Clin Interv Aging* 2012;7:517-23.
34. Wang Y, Peng R, Ma R. Epidemiological investigation of osteoarthritis in middle-aged mongolian and senior residents of the inner mongolia autonomous region. *Iran Red Crescent Med J* 2013;15:e8303.
35. Shin D. Association between metabolic syndrome, radiographic knee osteoarthritis, and intensity of knee pain: results of a national survey. *J Clin Endocrinol Metab* 2014;99:3177-83.
36. Cimmino MA, Sarzi-Puttini P, Scarpa R, Caporali R, Parazzini F, Zaninelli A, et al. Clinical presentation of osteoarthritis in general practice: determinants of pain in Italian patients in the AMICA study. *Semin Arthritis Rheum* 2005;35:17-23.
37. Magnusson K, Hagen KB, Osteras N, Nordsletten L, Natvig B, Haugen IK. Diabetes is associated with increased hand pain in erosive hand osteoarthritis - data from a population-based study. *Arthritis Care Res (Hoboken)* 2014.
38. Conaghan PG, Peloso PM, Everett SV, Rajagopalan S, Black CM, Mavros P, et al. Inadequate pain relief and large functional loss among patients with knee osteoarthritis: evidence from a prospective multinational longitudinal study of osteoarthritis real-world therapies. *Rheumatology (Oxford)* 2014.
39. Zullig LL, Bosworth HB, Jeffreys AS, Corsino L, Coffman CJ, Oddone EZ, et al. The association of comorbid conditions with patient-reported outcomes in Veterans with hip and knee osteoarthritis. *Clin Rheumatol* 2014.
40. Bija MD, Luma HN, Temfack E, Gueleko ET, Kemta F, Ngandeu M. Patterns of knee osteoarthritis in a hospital setting in sub-Saharan Africa. *Clin Rheumatol* 2014.
41. Wang S, Ganguli AX, Macaulay D, et al. The economic Burden of osteoarthritis in americans: Analysis from a privately insured population. *ACR congress* 2013.
